# Supplementary material for: Relationship between BMI with percentage body fat and obesity in Singaporean adults – The Yishun Study
Source: Springer Nature journal article supplement (doi:10.1186/s12889-021-11070-7), 2021-06-01
Supplement: MOESM1 [file 19222420]

**Supplementary Table. Comparing estimated BF% at various BMI point of Singaporean Chinese in this study versus the 1998 National Health Survey <sup>1</sup>**

|              | Yishun Study |        |        |        |        | 1998 National Health Survey |        |        |        |        | Difference in BF% |        |        |        |        |
|--------------|--------------|--------|--------|--------|--------|-----------------------------|--------|--------|--------|--------|-------------------|--------|--------|--------|--------|
|              | BMI 18.5     | BMI 25 | BMI 30 | BMI 35 | BMI 40 | BMI 18.5                    | BMI 25 | BMI 30 | BMI 35 | BMI 40 | BMI 18.5          | BMI 25 | BMI 30 | BMI 35 | BMI 40 |
| <b>Men</b>   |              |        |        |        |        |                             |        |        |        |        |                   |        |        |        |        |
| 20-39y       | 19.0         | 27.7   | 31.8   | 34.8   | 37.0   | 17.0                        | 23.8   | 29.0   | 34.2   | 39.4   | 2.0               | 3.9    | 2.8    | 0.6    | -2.4   |
| 40-59y       | 20.8         | 29.5   | 33.6   | 36.6   | 38.8   | 19.0                        | 25.8   | 31.0   | 36.2   | 41.4   | 1.8               | 3.7    | 2.6    | 0.4    | -2.6   |
| 60-79y       | 22.7         | 31.3   | 35.3   | 38.2   | 40.4   | 21.0                        | 27.8   | 33.0   | 38.2   | 43.4   | 1.7               | 3.5    | 2.3    | 0.0    | -3.0   |
| 80+ y        | 23.9         | 32.6   | 36.7   | 39.7   | 41.9   | 22.5                        | 29.3   | 34.5   | 39.7   | 44.9   | 1.4               | 3.3    | 2.2    | 0.0    | -3.0   |
| <b>Women</b> |              |        |        |        |        |                             |        |        |        |        |                   |        |        |        |        |
| 20-39y       | 31.8         | 39.0   | 42.5   | 44.9   | 46.8   | 27.9                        | 34.7   | 39.9   | 45.1   | 50.3   | 3.9               | 4.3    | 2.6    | -0.2   | -3.5   |
| 40-59y       | 32.8         | 40.1   | 43.5   | 46.0   | 47.8   | 29.9                        | 36.7   | 41.9   | 47.1   | 52.3   | 2.9               | 3.4    | 1.6    | -1.1   | -4.5   |
| 60-79y       | 33.8         | 41.1   | 44.5   | 47.0   | 48.8   | 31.9                        | 38.7   | 43.9   | 49.1   | 54.3   | 1.9               | 2.4    | 0.6    | -2.1   | -5.5   |
| 80+ y        | 34.6         | 41.8   | 45.3   | 47.7   | 49.6   | 33.4                        | 40.2   | 45.4   | 50.6   | 55.8   | 1.2               | 1.6    | -0.1   | -2.9   | -6.2   |

Values presented in percent (%). Difference in BF% is calculated by subtracting values of the 1998 National Health Survey from the current study.

**Reference:**

1. Deurenberg-Yap M, Schmidt G, Van Staveren WA, Deurenberg P. The paradox of low body mass index and high body fat percentage among Chinese, Malays and Indians in Singapore. *International Journal of Obesity* 2000; **24**(8): 1011-7
